# Supplementary material for: Policy impact of local democratic innovations: Lessons from Gdańsk Citizens’ Assemblies
Source: Research Square preprint supplement (doi:10.21203/rs.3.rs-7047746/v1), 2025-07-16
Supplement: Supplementary file 1 [file 126c28330df25fe5634b1aef.xlsx]

## Sheet: Tables
A. LIST OF RECOMMENDATIONS AND INFORMATION ON THEIR IMPLEMENTATION
RECOMMENDATIONS	IMPLEMENTATION	AUTHOR'S REMARKS
FIRST CA - 2016 - FLOOD PREVENTION
Question 1: What to do to improve the retention of rainwater in the TriCity Landscape Park (TPK)?
Establishing weirs and microretention; enabling meandering on the streams flowing through the TPK, restoration of swamps.	Not applicable	Out of competences of the city (the TPK is not subordinate to the city's authorities).
An unequivocal prohibition of full thinning in the TPK.	Not applicable	Out of competences of the city (the TPK is not subordinate to the city's authorities).
Construction of a new reservoir in Owczarnia and expansion of the Kiełpinek reservoir.	Yes
Investing in the so-called "small retention" on the Upper Terrace of the city to reduce the amount of water flowing into the TPK.	Yes
Spatial planning on the Upper Terrace of the city aimed to improve the retention of rainwater by increasing the area of ​​green areas on private land and by designating public areas with a ban on sale.	No data available
Reconstruction or modernization of retention reservoirs in the TPK area (reservoirs no. 13, 14, 15, 16 from the proposals of Gdańsk Melioration).	Not applicable	Out of competences of the city (the TPK is not subordinate to the city's authorities).
Limiting deforestation by modifying the Forest Management Plan for the Gdańsk Forest District by introducing: a ban on full thinning and limiting the size of clearing nests in complex thinnings to 20 ares in the catchment area of ​Strzyża and Oliwski streams.	Not applicable	Out of competences of the city (the TPK is not subordinate to the city's authorities).
Question 2: What should be the scope of assistance for the residents of Gdańsk after a heavy rain?
Including District Councils in helping residents in cooperation with the Municipal Family Support Centre.	Yes
Increasing the resources to engage more people to help immediately after the flooding occurs by creating a volunteer emergency response service; preparation and training of this service, and reimbursement of its operating costs.	No
Increasing the number of pumps and dehumidification devices, and the number of people who will operate them.	Yes
Development of an open, operational flood protection plan, containin the division of responsibilities and sequence of actions.	Yes
Education for residents regarding the possibility of getting help after an overflow.	Yes
Establishing an agreement with the union of Polish construction experts on assisting residents in assessing the technical condition of buildings (if they are suitable for renovation and how they can be drained).	No data available
Establishment of an efficient city call centre.	Yes	However, the project had been developed before the CA (since 2015).
Provision of free public transport after the flooding occurs.	Not applicable	Since 2017 there was no flood in Gdansk, thus there have been no need yet to provide free transport.
Question 3: When building new retention reservoirs, should the city resign from partially filling them with water?
Any type of reservoir is good, depending on the location and flood prevention needs.	Not applicable	The recommendation did not impose any obligation on the city authorities - it delegated the decision on types of reservoirs to public officials.
SECOND CA - 2017 - AIR QUALITY
Question: How to improve air quality?
Informing the residents of Gdańsk about the levels of air pollution with the use of the existing passenger information boards.	Yes
Conducting an educational campaign aimed at all female and male residents of Gdańsk, adjusted to their age and competences. The aim of the campaign should be to raise awareness about air quality, taking into account the sources and consequences of pollution. The campaign should inform about the need to replace solid fuel stoves.	Partly	There was an educational campain on air quality but it was targeted only to citizens who used coal-fired stoves.
Appointment by the President of the City of Gdańsk of a team whose aim will be to develop a coherent plan for the replacement of solid fuels stoves, taking into account specific dates and amounts, in cooperation with local universities, students and residents. The task of the team will also be an inventory of buildings that require thermal modernization and replacement of stoves.	Yes
Provision of consulting services for residents by the city of Gdańsk in the field of thermal modernization of buildings.	Yes
Development and ongoing updating of the air pollution map for Gdańsk.	Yes
Informing by the city of Gdańsk of air pollution levels in accordance with the recommendations of the World Health Organization (eg after exceeding 50 µg / m3 for PM10 particulate matter).	Yes
Introduction of a resolution on clean air (anti-smog resolution), introducing total ban on solid fuel combustion after a 5-year transition period and an immediate ban on burning the worst quality fuels (including coal dust and wood with a moisture content above 20%). The ban does not include smoking in top-class fireplaces with filters.	Not applicable	Out of competences of the city - adoption of anti-smog resolution is in the competence of regional government. However, the regional government adopted such resolution.
Development of a protective program connected with the adoption of the anty-smog resolution, which will include 100% compensation of the costs of stove replacement and compensation for an increase of heating costs for people who are qualified for social assistance benefits.	Yes
Invitation to discuss the adoption of a anti-smog resolution for the Gdańsk-Gdynia-Sopot Metropolitan Area.	Yes
THIRD CA - 2017 - CITIZEN ACTIVITY
Question 1: How to support the development of citizen activity in schools?
Analysis of the possibility of introducing participatory budgeting at the school level.	No data available
Implementation of the project "School with an idea", proposed by the Youth City Council.	No data available
Development of the concept of introducing democratic education in public schools by the end of 2018.	No data available
Creation of a database of experts to improve/strengthen school classes, related to citizen ativity.	No data available
Publishing information about civic/social initiatives and about educational programs for students on the Gdańsk Educational Platform, and sending them via notifications to students and parents.	Yes
Developing opportunities to increase students' influence on the way the course of study is delivered in schools.	No data available
Developing opportunities to strengthen the role of the parents' council in schools.	No data available
Developing opportunities to increase the presence of municipal cultural institutions in schools.	No data available
Supporting programs integrating students, teachers and parents	No data available
Supporting programs within which older students teach younger ones.	No data available
Supporting educational programmes concerning history of the state and the city.	No data available
Trainings for teachers and educators on counteracting discrimination on grounds of e.g. gender, age, disability, health condition, race, nationality, ethnic origin, religion, denomination, non-denominational status, political belief, trade union membership, family status, lifestyle.	Yes	However, the trainings were conducted as a part of a programme which was adopted by a city council as a result of a different participatory process.
Promoting of citizens' initiatives in city media.	Yes
Question 2: How to strengthen participation tools and support citizen activity?
Conducting a comprehensive and every-time evaluation of the participatory budgeting.	Yes	However, implemented only in practice - the city council's resolution on participatory budgeting was not ammended accordingly.
Obligation to consult the District Councils on projects submitted to the participatory budgetting priror to voting on these projects by citizens; publishing the opinions of District Councils on the participatory budgeting website.	No	The Disctict Councinls are asked for giving their opinions, but no such obligation was imposes in the resolution on participatory budgeting.
Monitoring and evaluation of the participatory budgeting at every stage (availability of information for everyone on the participatory budgeting website and adding information on the status of the projects). The possibility of submitting comments and correcting projects (comments are of an advisory nature). Public consultation on projects prior to voting by citizens.	Partly	The participatory budgeting is monitored and evaluated but citizens can not comment or consult the projects before the voting.
Transfer of projects from the participatory budgeting which did not win, but obtained a lot of votes to the substantive departments of the City Hall, municipal units, and the Strategy and Budget Committee of the City of Gdańsk. Analysis of the citizens' needs on the basis of all submitted projects and including them in the Budget of the City of Gdańsk.	No
Development of the concept of strengthening the competences of District Councils and increasing the implementation of the subsidiarity principle. Analysis of the possibility of introducing gratuities for District Councilors.	Yes	The conception was created and analysis was conducted as a part of the reform of the District Councils which is still developed by the city.
The obligation to consult with the District Councils of the concepts of Local Development Plans that relate to a specific district.	Yes	However, the obligaion had existed before the CA (had beed regulated in the statutes of the districts, adopted by the city council in 2014 and amended in the first half of 2017).
Enabling District Councils to take positions on matters which are not planned in their area, but which may have an impact on their functioning.	No
Creation of a dedicated city website where citizens of Gdańsk would be able to create appeals/petitions.	No
Introducing the term for municipal companies to react to letters, requests and opinions of District Councils (up to 30 days).	Not applicable	Out of competences of the city (the term is regulated by the national law).
Expanding District Councils' opportunities to inform residents about their activities; providing funds for this purpose.	Partly	The districts' budgets were increased but the reform of the District Councils is still prepared by the city.
Indroducing the Register of Consultation Processes on the website of the City Hall in Gdańsk, containing i.a. requests for consultations and comments received in the consultation process (with information if and why they were not implemented).	Yes
Introductng the Annual Consultation Plan (e.g. selection of topics for citizens' assemblies) on the website of the City Hall, and its the current update.	No
Modernization of the city website by removing (creating) the "Active Citizen" tab, whith easy access to voting, districts matters, submitting appeals/petitions, notifications about events (preferably divided into districts), messages for citizens and other, and creating a mobile application that will reflect the city website, sending scheduled alerts (after selecting the interesting topics by the…	No
Providing basic formal and legal information during public consultations.	No data available
Cooperation with the assembly members in implementing recommendations from the CA by the City Hall.	No
Creating a habdbook for social activists or collecting in one place on the website (eg. a subpage on participation) information on the possibilities of using urban spaces.	No
Teaching about participation, how to talk about the city and how to get involved - education about participation, both for residents and officials.	Yes
Increasing the number of citizens' assemblies to strengthen the influence of citizens on making important decisions in city matters.	No
Question 3: How to promote equal treatment of women and men, and LGBT people?
Increasing funds allocated to NGOs and medical entities for helping victims of violence (experiencing it for various reasons).	No data available
Introducing anti-discrimination classes for students, teachers, educators and pedagogues - voluntary and with the consent of parents. Support in creating a friendly and non-discriminatory school.	Yes	However, the classes were conducted as a part of a programme which was adopted by a city council as a result of a different participatory process.
Introducing anti-discrimination trainings for public servants working at all levels of administration or in municipal organizational units (eg. in the areas of culture, education, sport), and uniformed services.	Yes	However, the trainings were conducted as a part of a programme which was adopted by a city council as a result of a different participatory process.
Audit of the criteria for financing male and female teams from the budget of the City of Gdańsk in terms of equal access based on gender. Based on audit data, preparation and implementation of a mechanism to equalise the scope of financing of male and female teams. Analysis of the scope of accessibility of sports infrastructure in terms of equal access based on gender. On the basis of the analysi…	No data available
Creation of printed and electronic information with addresses and telephone numbers of help points for victims of violence	Yes
Promoting the idea of ​​a workplace free from mobbing among Gdańsk employers (e.g. through social campaigns), especially in all units subordinate to the city or municipal companies.	Yes
Developing rapid assistance programs for people at risk of crisis, such as accessible hostels, financial support, psychological assistance, and emergency medical care, including child care.	Yes	However, these measures had been implemented before the CA as a part of an anti-viloence programme, which had beed adopted by the city council in 2016 - the city council is obliged to adopt such programmes on the basis of a national law.
Development and application of a strategy and policy to improve safety in individual districts of the city of Gdańsk	Yes	However, these such strategy/policy had been implemented before the CA as a part of a crime prevention programme, which had beed adopted by the city council in 2016 - the city council is obliged to adopt such programmes on the basis of a national law.
B. LEVEL OF IMPLEMENTATION OF RECOMMENDATIONS IN THE CITY'S PUBLIC POLICIES
Number of recommendations:	1st CA	2nd CA	3rd CA	in total
in total:	16	9	38	63
unimplementable:	6	1	1	8
with no data available about implementation:	2	0	13	15
implemented:	7	7	14	28
partly implemented:	0	1	2	3
not implemented:	1	0	9	10
Implementation rate:	0.875	0.9375	0.625	0.7375
